# Supplementary material for: Incidence of Rifampicin Resistance in Periprosthetic Joint Infection: A Single-Centre Cohort Study on 238 Patients
Source: MDPI journal article supplement (doi:10.3390/antibiotics12101499), 2023-09-30
Supplement: s1 [file s1]

## Supplementary Materials

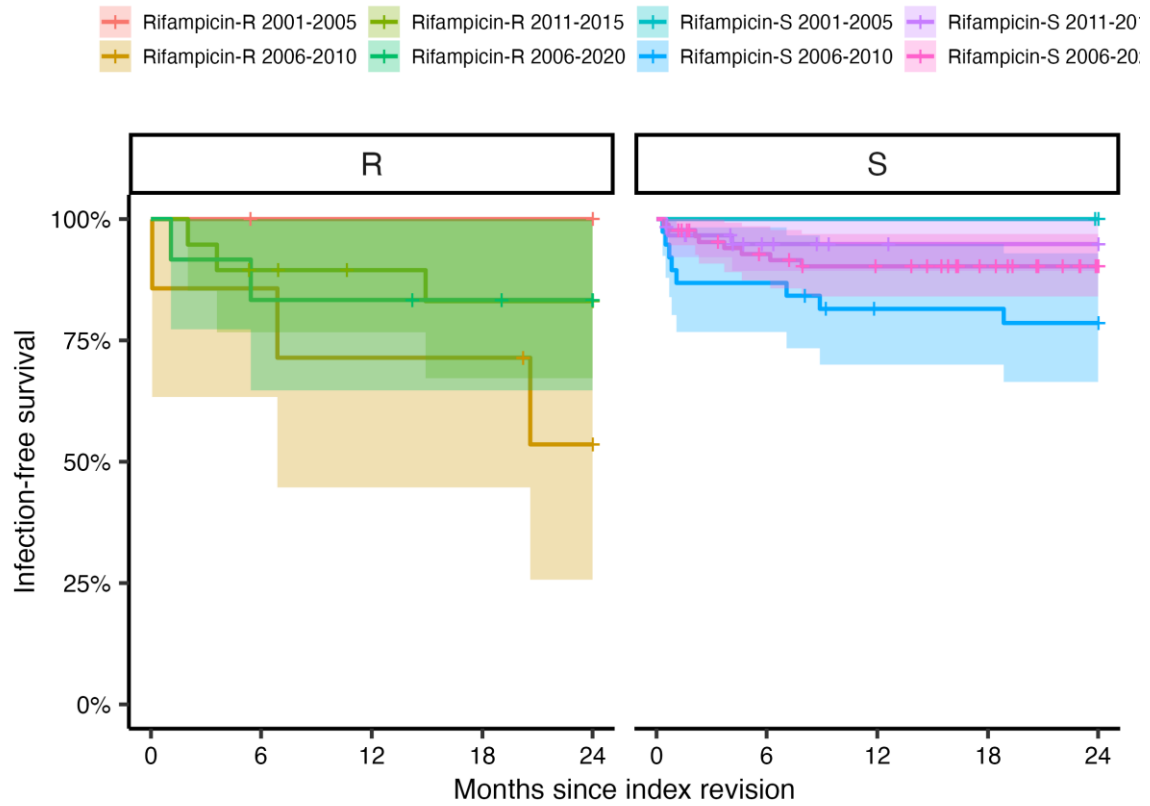

**Figure S1.** Kaplan-Meier analysis for 2-year infection-free survival over time. Stratification was undertaken for bacteria resistant (left column) and sensitive (right column) to rifampicin as well as the different intervals investigated. The shaded areas indicate 95% confidence intervals and the vertical ticks censoring.
